# Supplementary material
Source: Springer Nature journal article supplement (https://www.springermedizin.de/resource/supplementary/12889_2012_4864_MOESM2_ESM.pdf/9490612)
Supplement: MOESM2 [file 9490612]

**Table 2: Relationship between risk factors of, sanitation status among PLWHA on Home Based Care clients of Gondar town, 2009. (n= 294)**

| Characteristics                                | Sanitation status |          | Crude OR<br>(95% CI) | Adjusted OR<br>(95% CI) |
|------------------------------------------------|-------------------|----------|----------------------|-------------------------|
|                                                | Unimproved        | Improved |                      |                         |
|                                                | Illiterate(can't  |          | 1.0                  | 1.0                     |
| Educational status                             | Read and write)   | 98       | 31                   |                         |
|                                                | Read and write    | 32       | 9                    | 1.12(0.48, 2.61)        |
|                                                | Elementary        | 29       | 22                   | 0.41(0.21, 0.82)*       |
|                                                | Secondary         | 31       | 27                   | 0.36(0.18,0 .69)*       |
| Income quintile                                | Above grade12     | 7        | 8                    | 0.27(0.09,0 .82)*       |
|                                                | Lowest(poorest)   | 32       | 21                   | 0.73(0.32, 1.68)        |
|                                                | Second (poor)     | 26       | 15                   | 0.83(0.34, 2.03)        |
|                                                | Third (middle)    | 68       | 32                   | 1.02(0.48, 2.16)        |
|                                                | Fourth(High)      | 40       | 14                   | 1.38(0.58, 3.28)        |
|                                                | Fifth (Highest)   | 31       | 15                   | 1.0                     |
| Household latrine availability                 | Yes               | 86       | 84                   | 1.0                     |
|                                                | No                | 111      | 13                   | 8.34(4.36, 15.95)*      |
| House hold members discriminate in the latrine | yes               | 11       | 3                    | 1.85(0.50, 6.80)        |
|                                                | No                | 186      | 94                   | 1.0                     |

|                                       |     |     |    |                   |                   |
|---------------------------------------|-----|-----|----|-------------------|-------------------|
| Have you discriminated in the latrine | yes | 11  | 5  | 1.08(0.36, 3.22)  | 0.30(0.05, 1.62)  |
|                                       | No  | 186 | 92 | 1.0               | 1.0               |
| do you need help with walking         | yes | 10  | 2  | 2.54(0.54, 11.82) | 1.57 (0.26, 9.49) |
|                                       | No  | 187 | 95 | 1.0               | 1.0               |
| diarrhea for the past 24 hour         | Yes | 14  | 9  | 0.74(0.31, 1.79)  | 0.61(0.19, 1.87)  |
|                                       | No  | 183 | 88 | 1.0               | 1.0               |

---

**\* Statistically significant association P<0.05**
